# Supplementary material
Source: PubMed Central journal article supplement (PMC10238373)
Supplement: 41541_2023_686_MOESM2_ESM.pdf [file 41541_2023_686_MOESM2_ESM.pdf]

## Reporting Summary

Nature Portfolio wishes to improve the reproducibility of the work that we publish. This form provides structure for consistency and transparency in reporting. For further information on Nature Portfolio policies, see our [Editorial Policies](#) and the [Editorial Policy Checklist](#).

### Statistics

For all statistical analyses, confirm that the following items are present in the figure legend, table legend, main text, or Methods section.

- | n/a                                 | Confirmed                                                                                                                                                                                                                                                                                      |
|-------------------------------------|------------------------------------------------------------------------------------------------------------------------------------------------------------------------------------------------------------------------------------------------------------------------------------------------|
| <input type="checkbox"/>            | <input checked="" type="checkbox"/> The exact sample size ( $n$ ) for each experimental group/condition, given as a discrete number and unit of measurement                                                                                                                                    |
| <input type="checkbox"/>            | <input checked="" type="checkbox"/> A statement on whether measurements were taken from distinct samples or whether the same sample was measured repeatedly                                                                                                                                    |
| <input type="checkbox"/>            | <input checked="" type="checkbox"/> The statistical test(s) used AND whether they are one- or two-sided<br><i>Only common tests should be described solely by name; describe more complex techniques in the Methods section.</i>                                                               |
| <input type="checkbox"/>            | <input checked="" type="checkbox"/> A description of all covariates tested                                                                                                                                                                                                                     |
| <input type="checkbox"/>            | <input checked="" type="checkbox"/> A description of any assumptions or corrections, such as tests of normality and adjustment for multiple comparisons                                                                                                                                        |
| <input type="checkbox"/>            | <input checked="" type="checkbox"/> A full description of the statistical parameters including central tendency (e.g. means) or other basic estimates (e.g. regression coefficient) AND variation (e.g. standard deviation) or associated estimates of uncertainty (e.g. confidence intervals) |
| <input type="checkbox"/>            | <input checked="" type="checkbox"/> For null hypothesis testing, the test statistic (e.g. $F$ , $t$ , $r$ ) with confidence intervals, effect sizes, degrees of freedom and $P$ value noted<br><i>Give <math>P</math> values as exact values whenever suitable.</i>                            |
| <input checked="" type="checkbox"/> | <input type="checkbox"/> For Bayesian analysis, information on the choice of priors and Markov chain Monte Carlo settings                                                                                                                                                                      |
| <input checked="" type="checkbox"/> | <input type="checkbox"/> For hierarchical and complex designs, identification of the appropriate level for tests and full reporting of outcomes                                                                                                                                                |
| <input type="checkbox"/>            | <input checked="" type="checkbox"/> Estimates of effect sizes (e.g. Cohen's $d$ , Pearson's $r$ ), indicating how they were calculated                                                                                                                                                         |

*Our web collection on [statistics for biologists](#) contains articles on many of the points above.*

### Software and code

Policy information about [availability of computer code](#)

|                 |                                                                                                                                                                                                                                                                                                                                        |
|-----------------|----------------------------------------------------------------------------------------------------------------------------------------------------------------------------------------------------------------------------------------------------------------------------------------------------------------------------------------|
| Data collection | Microsoft Power Point 2016; Microsoft Excel 2016; ICS/flow cytometry analysis: S CyotFLEX LX flow cytometer (Beckman Coulter); RT-qPCR: Applied Biosystems 7500 Fast PCR system (Thermo Fisher); IFN-gamma EliSpot: AELVIS ElisSpot reader (Hannover, Germany); Western blot images ChemiDoc imager (BioRad).                          |
| Data analysis   | Microsoft Power Point 2016; Microsoft Excel 2016; ICS samples Kaluza Analysis Software 2.1 (Beckman Coulter); RT-qPCR, Applied Biosystems 7500 software v2.3 (ThermoFisher); IFN-gamma EliSpot: AELVIS ElisSpot reader (Hannover, Germany); Densitometry analysis: Bio-Rad Image Lab software 6.1 (BioRad), GraphPad Prism 9 software. |

For manuscripts utilizing custom algorithms or software that are central to the research but not yet described in published literature, software must be made available to editors and reviewers. We strongly encourage code deposition in a community repository (e.g. GitHub). See the Nature Portfolio [guidelines for submitting code & software](#) for further information.

## Data

Policy information about [availability of data](#)

All manuscripts must include a [data availability statement](#). This statement should provide the following information, where applicable:

- Accession codes, unique identifiers, or web links for publicly available datasets
- A description of any restrictions on data availability
- For clinical datasets or third party data, please ensure that the statement adheres to our [policy](#)

All relevant results generated during the present study will be available upon request made to correspondence author

## Human research participants

Policy information about [studies involving human research participants and Sex and Gender in Research](#).

Reporting on sex and gender

N/A

Population characteristics

N/A

Recruitment

N/A

Ethics oversight

N/A

Note that full information on the approval of the study protocol must also be provided in the manuscript.

## Field-specific reporting

Please select the one below that is the best fit for your research. If you are not sure, read the appropriate sections before making your selection.

Life sciences  Behavioural & social sciences  Ecological, evolutionary & environmental sciences

For a reference copy of the document with all sections, see [nature.com/documents/nr-reporting-summary-flat.pdf](https://www.nature.com/documents/nr-reporting-summary-flat.pdf)

## Life sciences study design

All studies must disclose on these points even when the disclosure is negative.

Sample size

Sample size in animal studies was dictated by the 3R principle. In addition, already published results concerning immunogenicity/efficacy using the same immunogens helped us to minimize the number of mice included in each experimental group. Ex vivo assays were carried out with the maximum number of cells isolated from different animal tissues

Data exclusions

No data were excluded

Replication

The experimental design with animals is reported on fig. 1 of our ms. All cell samples isolated from animals were tested with numbers of replicates sufficient to calculate statistics as detailed in the figure legends. On the other hand, samples from lungs of immunized/infected animals were limited in terms of recovered number of cells. In some instances, this limitation hindered the possibility to produce a number of replications adequate for statistics

Randomization

K18-hACE2 mice were randomized by body weight

Blinding

In many instances, blinding was not possible in our studies. In animal experiments, blinding was precluded for safety reasons, considering the hazardous biological material we manipulated. In "ex vivo analysis", the paucity of cells isolated from lungs prevented the possibility to include the same number/type of negative control for each experimental condition.

## Reporting for specific materials, systems and methods

We require information from authors about some types of materials, experimental systems and methods used in many studies. Here, indicate whether each material, system or method listed is relevant to your study. If you are not sure if a list item applies to your research, read the appropriate section before selecting a response.

## Materials &amp; experimental systems

|                                     |                                                                 |
|-------------------------------------|-----------------------------------------------------------------|
| n/a                                 | Involved in the study                                           |
| <input type="checkbox"/>            | <input checked="" type="checkbox"/> Antibodies                  |
| <input type="checkbox"/>            | <input checked="" type="checkbox"/> Eukaryotic cell lines       |
| <input checked="" type="checkbox"/> | <input type="checkbox"/> Palaeontology and archaeology          |
| <input type="checkbox"/>            | <input checked="" type="checkbox"/> Animals and other organisms |
| <input checked="" type="checkbox"/> | <input type="checkbox"/> Clinical data                          |
| <input checked="" type="checkbox"/> | <input type="checkbox"/> Dual use research of concern           |

## Methods

|                                     |                                                    |
|-------------------------------------|----------------------------------------------------|
| n/a                                 | Involved in the study                              |
| <input checked="" type="checkbox"/> | <input type="checkbox"/> ChIP-seq                  |
| <input type="checkbox"/>            | <input checked="" type="checkbox"/> Flow cytometry |
| <input checked="" type="checkbox"/> | <input type="checkbox"/> MRI-based neuroimaging    |

## Antibodies

## Antibodies used

- APC-conjugated anti-mouse CD45 antibody, clone 104, cat. 20-04540U100, Tonbo-Bioscience
- anti-mouse CD16/CD32, clone 93, cat. 12-7021-82, eBioscience, Thermo Fisher
- FITC-conjugated anti-mouse CD3, clone 17A2, cat. 555274, BD Biosciences
- APC-Cy7-conjugated anti-mouse CD8a, clone53-6.7, cat. 557654, BD Biosciences
- PerCP conjugated anti-mouse CD4, clone RM4-5, cat. 553052, BD Biosciences
- BUV395-conjugated anti-mouse CD44, clone IM7, cat. 740215, BD Biosciences
- BUV750-conjugated anti-mouse CD49a, clone Ha31/8, cat. 746854, BD Biosciences
- PECF594-conjugated anti-mouse CD69, clone H1.2F3, cat. 562455, BD Biosciences
- BUV563-conjugated anti-mouse CD103, clone M290, cat. 741261, BD Biosciences
- PE-Cy7-conjugated anti-mouse IFN- $\gamma$ , clone XMG1.2, cat. 25-7311-82, eBioscience, Thermo Fisher
- PE-conjugated anti-mouse IL-2, clone JES6-5H4, cat. 12-7021-82, eBioscience, Thermo Fisher
- BV421-conjugated anti-mouse TNF- $\alpha$ , clone MP6-XT22, cat. 563387, BD Biosciences
- Anti-mouse IFN-AN18 mAb, cat. 3321-3-250 (Mabtech)
- R4-6A2 biotinylated anti-IFN- $\gamma$ , cat. 3321-6-250(Mabtech)
- anti-flag M2 mAb (H1029-Merck)
- anti-human  $\beta$ -actin monoclonal antibody, cat. 122625 (Cell signaling)
- HRP-conjugated anti-mouse IgG, cat. 170-6516 (BioRad)
- anti-human Alix polyclonal antibody, cat. PA5-52873 (Invitrogen)
- HRP-conjugated anti-rabbit IgG, cat. NA934V (Amersham)

## Validation

All antibodies are commercially available and validated by the manufacturers

## Eukaryotic cell lines

Policy information about [cell lines and Sex and Gender in Research](#)

|                                                                      |                                                                                                              |
|----------------------------------------------------------------------|--------------------------------------------------------------------------------------------------------------|
| Cell line source(s)                                                  | Human embryonic kidney (HEK) 293T cells (ATCC, CRL-11268). x vivo cells were obtained from female mice only. |
| Authentication                                                       | HEK293T cell authentication was as indicated by ATCC                                                         |
| Mycoplasma contamination                                             | HEK293T cells we used tested negative for mycoplasma, as assessed using PCR-based commercial assays.         |
| Commonly misidentified lines<br>(See <a href="#">ICLAC</a> register) | N/A                                                                                                          |

## Animals and other research organisms

Policy information about [studies involving animals](#); [ARRIVE guidelines](#) recommended for reporting animal research, and [Sex and Gender in Research](#)

|                         |                                                                                                                                                                             |
|-------------------------|-----------------------------------------------------------------------------------------------------------------------------------------------------------------------------|
| Laboratory animals      | Six-week-old C57 Bl/6 K18-hACE2 transgenic female mice                                                                                                                      |
| Wild animals            | N/A                                                                                                                                                                         |
| Reporting on sex        | All mice we used were female. Sex was not considered in the study design.                                                                                                   |
| Field-collected samples | The study did not involve samples collected from the field                                                                                                                  |
| Ethics oversight        | Istituto Superiore di Sanità, approved by the Italian Ministry of Health, authorizations 565/2020 and 591/2021, released on June 3rd 2020 and July 30th 2021, respectively. |

Note that full information on the approval of the study protocol must also be provided in the manuscript.

## Flow Cytometry

### Plots

Confirm that:

- The axis labels state the marker and fluorochrome used (e.g. CD4-FITC).
- The axis scales are clearly visible. Include numbers along axes only for bottom left plot of group (a 'group' is an analysis of identical markers).
- All plots are contour plots with outliers or pseudocolor plots.
- A numerical value for number of cells or percentage (with statistics) is provided.

### Methodology

Sample preparation

PBMCs were recovered from EDTA-blood samples obtained through retro orbital puncture under topical anesthesia. Erythrocytes were removed by treatment with ACK lysing buffer (Gibco) according to the manufacturer's instructions. To isolate splenocytes, spleens were explanted, placed into tubes containing 1 mL of RPMI 1640 and 50  $\mu$ M 2-mercaptoethanol, then transferred into 60 mm Petri dishes with 2 mL of the same medium. Splenocytes were obtained by notching the spleen sac and pushing the cells out with the plunger seal of a 1 mL syringe. After addition of 2 mL of medium, cells were transferred into a 15 mL conical tube, and the Petri plate washed with 4 mL of medium to maximize cell recovery. Afterwards, cells were collected by centrifugation, resuspended in RPMI complete medium containing 50  $\mu$ M 2-mercaptoethanol and 10% FCS, and counted.

For lung cell isolation, circulating blood cells were fluorescently labeled with 2  $\mu$ g (10  $\mu$ l of the commercial stock) of an anti-CD45 antibody (Tonbo-Bioscience, S. Diego, CA anti-mouse CD45.2-APC) diluted in 200  $\mu$ l of 1 $\times$ PBS inoculated in the tail vein exactly 3 minutes before cervical dislocation. For cell recovery, lungs were excised, washed with 1 $\times$ PBS, cut into small pieces, and then digested for 30 minutes under gentle agitation at 37°C with 7 mL of 4 mg/mL of type III collagenase (Worthington Biochemical, Lakewood, NJ) and 0.05 mg/mL of DNase I (Sigma) in 1 $\times$ PBS. After digestion, an equal volume of medium was added and cells were passed through a 70  $\mu$ m cell strainer, washed, and resuspended in 1 $\times$ PBS/ACK 1:1 for red blood cells lysis. Finally, the isolated cells were resuspended in complete culture medium and counted.

Instrument

CyotFLEX LX (Beckman Coulter, Brea, CA, USA)

Software

Kaluza software (Beckman Coulter).

Cell population abundance

Samples of at least 100,000 cells/condition were analyzed. Treatmet with fluoresently labelled anti-CD3 mAb served to identify the relevant cell populations to be analyzed

Gating strategy

Live cells as assessed by LIVE/DEAD dye vs. FSC-A, singlet cells from FSC-A vs. FSC-H (singlet 1) and SSC-A vs. SSC-W (singlet 2), CD3+ cells from CD3-FITC vs. SSC-A, CD8+, or CD4+ cells from CD8-APC-Cy7 vs. CD4-PerCP. CD3+/CD8+ cell population was gated against CD44+ cells, and, to detect polyfunctional CD8+ T lymphocytes, the population of cells positive for both CD8 and CD44 was analyzed for APC-Cy7, PE, and BV421 to detect simultaneous changes in IFN- $\gamma$ , IL-2, and TNF- $\alpha$  production, respectively. To detect CD8+ T resident memory (Trm), the population of cells positive for both CD8 and CD44 was analyzed for the co-expression of CD49a, CD69, and CD103. Boolean gates were created to measure co-expression patterns.

- Tick this box to confirm that a figure exemplifying the gating strategy is provided in the Supplementary Information.
